# Supplementary material
Source: PubMed Central journal article supplement (PMC3387112)
Supplement: 1206945109_pnas.201206945SI.pdf [file 1206945109_pnas.201206945SI.pdf]

# Supporting Information

Song et al. 10.1073/pnas.1206945109

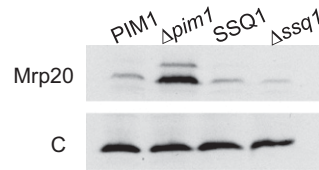

**Fig. S1.** Levels of Mrp20, a substrate of Pim1. Because Mrp20 is unstable only in the absence of functional mtDNA, indicated strains were rendered  $\rho$ -negative by culturing in rich media containing 2  $\mu$ g/mL of ethidium bromide for 4 d. Respiratory incompetent cells were then cultured in fresh media. Mitochondrial lysates were prepared and subjected to immunoblot analysis with Mrp20-specific antibodies or, as a loading control, Mge1-specific antibodies (c).

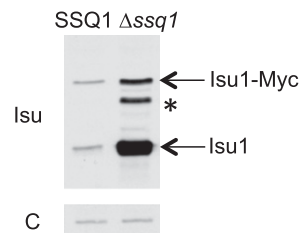

**Fig. S2.** Isu1-Myc migrates more slowly than Isu in SDS/PAGE. Cell lysates of  $\Delta isu1\Delta isu2$  *ISU1*-Myc with either a deletion of *SSQ1* ( $\Delta ssq1$ ) or a WT copy of the gene (*SSQ1*) and harboring *ISU1* on a plasmid were prepared. Proteins were separated by SDS/PAGE and subjected to immunoblot analysis with Isu-specific antibodies or, as a loading control, Mge1-specific antibodies (c). The asterisk indicates a likely partial degradation product of Isu1-Myc.

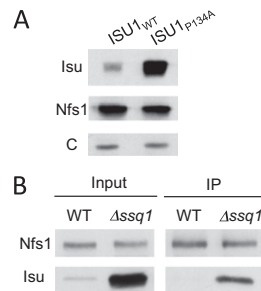

**Fig. S3.** Nfs1 levels. (A) Cell lysates of  $\Delta isu1\Delta isu2$  cells expressing WT Isu1 or Isu1<sub>P134A</sub> were subjected to immunoblot analysis using Isu, Nfs1, and, as a control, Mge1-specific antibodies. (B) Lysates of mitochondria prepared from WT or  $\Delta ssq1$  cells were subjected to immunoprecipitation (IP) using Nfs1-specific antibodies. Precipitated Nfs1 and Isu1 (IP) were detected by immunoblot analysis using specific antibodies, with 4% of mitochondrial lysate used as a loading control (Input). More complex was observed in  $\Delta ssq1$  lysates, consistent with the presence of more Nfs1 than Isu.
